# Supplementary material for: Genome-Wide Identification and Expression Analysis of the Copper Transporter (COPT/Ctr) Gene Family in Kandelia obovata, a Typical Mangrove Plant
Source: MDPI journal article supplement (doi:10.3390/ijms242115579), 2023-10-25
Supplement: s1 [file s1]

## Supplementary Materials

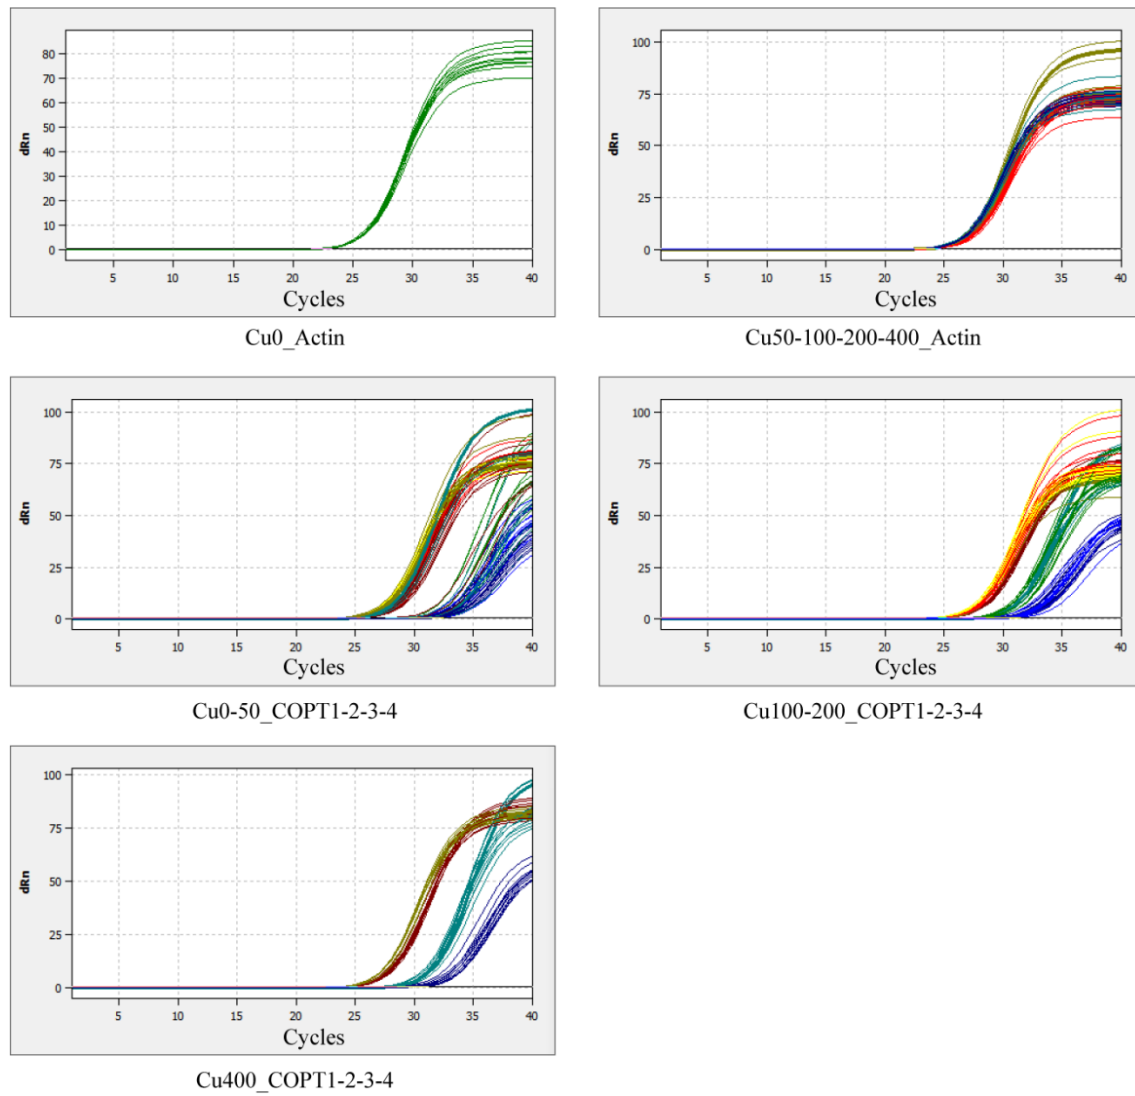

Figure S1. *COPT1-4* genes sample of curves from qPCR under five different Cu stress conditions (Cu0, Cu50, Cu100, Cu200, and Cu400 mg/L).
